# **Xist lncRNA forms silencing granules that induce heterochromatin formation and repressive complexes recruitment by phase separation**

Andrea Cerase<sup>1,5,\*</sup>, Alexandros Armaos<sup>2,5</sup>, Fernando Cid<sup>2</sup>, Philip Avner<sup>1</sup> and Gian Gaetano Tartaglia<sup>2,3,4,\*</sup>

- 1) EMBL-Rome, Via Ramarini 32, 00015 Monterotondo (RM), Italy
- 2) Centre for Genomic Regulation (CRG), The Barcelona Institute of Science and Technology, Dr Aiguader 88, 08003 Barcelona, Spain
- 3) Universitat Pompeu Fabra (UPF), 08003 Barcelona, Spain
- 4) Institut Catalana de Recerca i Estudis Avançats (ICREA), 23 Passeig Lluís Companys, 08010 Barcelona, Spain
- 5) Equal contribution

\*) To whom correspondence should be addressed: [andrea.cerase@embl.it](mailto:andrea.cerase@embl.it) and [gian.tartaglia@crg.eu](mailto:gian.tartaglia@crg.eu)

**Key words:** Xist lncRNA, long non-coding RNAs (lncRNA), tandem repeats, epigenetics, X chromosome inactivation (XCI), RNA-granules, stress granules, paraspeckles, liquid-phase separation, heterochromatin, intrinsically disordered proteins, intrinsically disordered RNAs, high-order chromatin structure, Polycomb Repressive Complexes 1/2 (PRC1/2), nuclear matrix, RNA-protein interaction, RNA secondary structure, ribonucleoprotein (RBN).

## **Main text**

Long non-coding RNAs (lncRNAs) are RNA molecules longer than 200 bases that lack coding potential<sup>1,2</sup>. They represent a significant portion of the cell transcriptome<sup>3</sup> and work as activators or repressors of gene transcription acting on different regulatory mechanisms<sup>4-6</sup>. Indeed, lncRNAs can act as macro-scaffolds for protein recruitment<sup>7-14</sup> and behave as guides and sponges for titrating RNA and proteins, influencing transcription at regulatory regions or triggering transcriptional interference<sup>15-17</sup>.

The ability of RNA to scaffold protein interactions has been shown to contribute to the formation of membrane-less organelles such as paraspeckles<sup>18</sup> and stress granules<sup>19</sup>. These assemblies, mainly composed of RNAs and proteins, aggregate through a process of liquid-liquid phase separation<sup>18-20</sup>. Formation of ribonucleoprotein granules is an evolutionary conserved mechanism for cells to respond to environmental changes<sup>61</sup> and favors the confinement of enzymes and nucleic acids in discrete regions of the nucleus or cytoplasm<sup>21</sup>. Structurally disordered and nucleic acid binding domains promote protein-protein and protein-RNA interactions in the granules<sup>22</sup>. Especially intrinsically disordered proteins, which are enriched in polar amino acids such as arginine, glycine and phenylalanine, have been shown to promote phase transitions in the cell<sup>23</sup>.

Recent experiments unveiled an interesting link between the process of phase separation and heterochromatinization<sup>24-26</sup>. Indeed, several lncRNAs such as HotAir<sup>27</sup>, ARNIL<sup>28</sup>, Airn<sup>29</sup> and Xist<sup>4</sup> lncRNAs can induce heterochromatin formation to different extent (reviewed in Long et al.<sup>6</sup>). Xist in particular, the master regulator of X chromosome inactivation, has been shown to induce large-scale heterochromatinization of the entire X-chromosome<sup>4</sup> accumulating in large granule-like assemblies that can be investigated by super-resolution microscopy<sup>30,31</sup> (**Fig. 1A**). Female cells show ~100-150 Xist-containing complexes<sup>30,31</sup> that largely resembles paraspeckles and stress granule in size and protein composition (see below). Intriguingly, Xist assemblies measure around 100-200 nm in diameter<sup>31</sup>, comparable with stress granules and paraspeckles dimensions (~100-

300 nm and ~200-500 nm in diameter, respectively<sup>32,19</sup>) (**Fig. 1A**). We note that the slight discrepancy in size of ribonucleoprotein assemblies is due to the diverse functions and compositions<sup>4,19,32</sup>. Other lncRNAs such as HotAir, Malat1 or Airn seem to form smaller *puncti* assemblies, rather than granule-like structures<sup>33,34</sup>. However, a stringent comparative analysis of these lncRNAs and their interacting proteins, by means of super-resolution microscopy is still missing, hampering a more formal comparison.

Supporting our observation that Xist assemblies are granule-like, we report that Xist interactions involve a copious number of proteins that phase separate. Indeed, Xist physically binds to a few dozen partners, although more than 600 proteins have been found to associate through non-direct, yet potentially biologically-relevant interactions (“putative” Xist network, see Materials and Methods for details)<sup>9</sup>. Using literature<sup>16,19,20,32</sup>, computational and experimental data, we found that the Xist direct interactome contains proteins that are prone to form granules. More specifically, the proteins binding to Xist show significant overlap with paraspeckles (29 out of 37 Xist binders are Neat1 interactors too; p-value < 0.002, Fisher’s test computed using 94 eCLIP experiments; 2 of the interactions (Rbm14 and Tardb1) are among the 7 paraspeckle architectural binders<sup>18,35,36</sup>; See **Table 1**) and stress-granule composition (20 out 37 direct interactors, with enrichment p-value < 0.0001 and 58 out of 631 enrichment p-value < 0.0002 considering all associations<sup>7-12</sup>; Fisher’s test enrichments calculated using 240 stress-granule core components<sup>37</sup>; see **Figure 1B** and online **Table S1**, <https://tinyurl.com/y9ygtyn4>). Moreover, all the 37 direct interactors are predicted to form large ribonucleoprotein assemblies (granule propensity scores > 0) and 27/37 are significantly prone to phase separate (granule propensity scores > 1). Furthermore, 24% of the putative Xist interactome is also enriched of granule-forming proteins (146 proteins; for this analysis we used the *catGRANULE* method<sup>23</sup>; all values are available at <https://goo.gl/8CBwMp> and <https://tinyurl.com/yd3tjzs5>; **Fig. 1B**). Among the Xist interactions, Rbm14 and Tardbp1 are reported to be critical in paraspeckles formation<sup>18</sup> while Hnrnp proteins, key components of stress-granules, are necessary for Xist silencing (HnrnpU)<sup>38</sup> and Polycomb recruitment (HnrnpK) activities, respectively<sup>39</sup>. By comparison, we analysed the putative interactome of other lncRNAs

such as HotAir and Malat1 (also known as NEAT2)<sup>40</sup>. We found a poor overlap with the interactomes of paraspeckles and stress-granules (HotAir: 0 out of 6 are Neat1 interactors, p-value=1 and 0 out of 6 are stress-granules components, p-value=1; Malat1: 5 out of 26 are Neat1 interactors, p-value=0.6, and 7 out of 26 are stress-granules components; p-value=0.2, Fisher's test). HotAir and Neat1 interactomes are significantly smaller than Xist's, supporting the observation that these RNAs form *puncti* assemblies<sup>33,34</sup>. These observations may indicate that not all lncRNAs are enriched in granule-forming proteins, possibly depending on RNA length, spatial conformation and protein interactions.

Structural disorder and nucleic acid-binding are properties of proteins that assemble into ribonucleoprotein (RNP) granules<sup>23</sup>. We observe a strong enrichment of structurally disordered proteins in the Xist interactome (18 out of 37, or 50%, physical interactions are predicted to be highly disordered with p-value enrichment < 0.0001; 184 out of 631, or 30%, total Xist associations are disordered, p=0.005; 111 out of 631 disordered-prone proteins are also forming stress granules, p-value = 0.001; calculations of structural disorder have been carried out using *cleverMachine*, values are available at <https://goo.gl/eyX2bq><sup>41</sup>; p-values were computed with *Chi-square* with Yates' correction; **Fig. 1C**). These results are truly remarkable, since the fraction of proteins predicted to be structurally disordered in *M. musculus* is 22% (i.e., 3467 out 15338 non-redundant; Uniprot database). Among the disordered-prone proteins, HnrnpA2B1 and HnrnpQ, Ptbp1, Ttcf711 and Spen show high propensity for granule formation and are core constituents of paraspeckles<sup>18</sup> and stress-granules<sup>19,20</sup>. We stress that the presence of structurally disordered proteins is important for the process of phase separation, as showed by different experimental and computational studies<sup>22,24,25</sup>. Indeed, eukaryotic proteomes contain intrinsically unfolded and repetitive regions in granule-forming proteins<sup>23</sup>, which confer them an intrinsic ability to promote protein-protein and protein-nucleic-acid interactions<sup>42,43,44</sup>. As a comparison, we analyzed the content of structurally disordered proteins in the interactomes of HotAir and Malat1, but the enrichments are not significant (highly disordered proteins: 2 out of 6 for HotAir, with p-value=0.7

and 6 out of 26 for Malat1 with p-value=0.4), indicating a substantial difference with Xist RNA interaction network.

In the large spectrum of activities, RNA structure plays a central role and dictates precise functionalities by creating spatial patterns and alternative conformations and binding sites for proteins<sup>45</sup>. As for Xist RNA, six conserved repetitive regions (tandem repeats), named A to F, have been reported to be essential for its function<sup>45</sup> (**Fig. 1C**). Xist repeats are conserved in mammalian vertebrates but considerable variation in the copy number is observed, with the exception of the A repeat region, which is conserved both in terms of copy number and consensus sequence<sup>45</sup>. In agreement with dimethyl sulfate (DMS)-sensitivity experiments<sup>46</sup> and predictions of RNA structure<sup>47</sup>, repeats A, B and E are highly structured (CROSS predictions are available at <https://goo.gl/yzqUjS>). While repeats A and B are conserved across species and show a high degree of structural content, the 3' region of Xist is variable and predicted to largely be single-stranded<sup>47</sup>. RNA-binding predictions of Xist interactions<sup>9,47</sup> indicate that Rep D and E and A (and B to a lesser extent) are crucial for Xist interactions with granule-forming proteins (**Fig. 1C**). This result is in line with the recent observation that structured regions attract granule-forming proteins<sup>48,61</sup>.

Could the formation granule-like assembly be relevant for Xist function? In a recent publication, we investigated the interaction of Xist with Ezh2 and other proteins of the PRC2 complex<sup>49</sup>. Using randomized repeat A as a control, we estimated Ezh2 to bind Xist with high affinity but low specificity<sup>49</sup>. Our findings are in good agreement with 3D-SIM data, showing poor overlap between Xist and PRC2<sup>30</sup>. Yet, data by Stochastic Optical Reconstruction Microscopy (STORM) indicate non-random association of Xist and PRC2<sup>50</sup>. Thus, Xist and PRC2 are closer than expected by chance, but their interactions are unstable, similarly to those established by disordered proteins within stress granules. This observation is particularly pertinent if we consider that ribonucleoprotein granules are in a dynamic intermediate metastable state<sup>51</sup> that makes their

purification particularly difficult. Indeed, the fast exchange with the *cell milieu* impedes the isolation of the liquid phase assemblies<sup>52,53</sup>.

At present, the interaction between Xist RNA and certain subunits of the PRC2 complex RNA and the molecular mechanisms of recruitment remain controversial. Some literature reports evidence arguing in favor<sup>54,55</sup> while other is against<sup>30,39,56</sup>. While the Xist-PRC2 interaction *in vitro* is strong, it is possible that the interaction of the PRC2 to repeat A *in vivo* has such a fast kinetics that prevents it to be captured by most studies<sup>50</sup>. The main point of discussion is the observation of a strong interaction between repeat A and PRC2 *in vitro*<sup>54,57</sup>, which seems to be dispensable *in vivo*<sup>39,56</sup> as a form of Xist lacking the repeat A<sup>58</sup>, can still induce *de novo* recruitment of PRC2 (and similarly of PRC1. These observations may indicate that more than one Xist region may be involved in this process. Indeed recent work has shown that the *de novo* recruitment of PRC2 is mediated by Xist RepB and non-canonical PRC1 variants<sup>28,37,56</sup>.

Here we propose that Xist exerts its functions through the formation of silencing granules in which repressive complexes are recruited by phase separation. More precisely, we suggest that non-canonical recruitment of repressive complexes PRC1 is promoted or reinforced by the formation of phase-separated large assemblies. In this scenario, the primary *de novo* PRC1 recruitment is mediated by Xist RepB<sup>39</sup> and PRC1-mediated H2A ubiquitination may trigger PRC2 recruitment as previously shown<sup>39,56,59,60</sup> (**Fig. 2**). PRC1 recruitment may be further strengthened via the interaction with other intrinsically disordered domain-containing proteins binding to Xist, thus mediating further recruitment and oligomerization (see **Fig.2**). It is possible that other disorder-containing domains proteins such as Saf-A (repeat A) or Matr3 and Ciz1 (repeat E) may mediate the PRC1 recruitment in the Xist body and trigger phase-separation (see **Table 1 and Fig. 2**; data available at <https://goo.gl/2o7L43> and <https://goo.gl/hsKq2R>). However, we cannot exclude that these interactions are mediated by other intrinsically-disordered proteins yet to be discovered binding the A-, D-3'end and the E-repeats (see **Fig. 2**). This multimerization driven by phase-separation may, in turn, trigger RNA Polymerase II (PolII) and basic transcription factors eviction, inducing gene-silencing and heterochromatinization. Supporting this hypothesis, we previously

reported that i) Ring1b is relatively closer to Xist than other PRC1/2 components, as shown by super-resolution analysis, suggesting a non-chromatin mediated yet indirect contact<sup>30</sup>; ii) structurally-disordered and granule-forming PRC1 core components such as Rybp and Rnf2 (Ring1b) are highly prone to interact with Xist<sup>9</sup>, directly or indirectly, in agreement with experimental screenings<sup>10,11,13</sup>; iii) nuclear matrix proteins are highly prone to interact with Xist RNA via Xist E-repeat<sup>9</sup>, iv) Xist RNA has all the critical characteristic of an RNA-protein granule (see above).

In brief, we suggest that regardless of the type of interaction, which could be direct or indirect, components of the PRC1/2 repressive complexes are recruited into Xist granules through a mechanism of phase separation. Noticeably, a similar mechanism for the recruitment of protein complexes may be exploited by other lncRNAs as well and may not be limited to Xist RNA. This mechanism of action can be used by lncRNAs to recruit other repressive complexes to the heterochromatin and not being limited to PRC1/2 complexes. As our hypothesis is supported by correlative evidence, more experimental work has to be done in order to fully validate it.

## **Acknowledgements**

We would like to thank all members of the Avner and the Tartaglia groups, Greta Pintacuda, Mitchell Guttman and Kathrin Plath for critical reading of the manuscript. AC and PA were funded by an EMBL grant to PA (50800). The research leading to these results has been supported by European Research Council (RIBOMYLOME\_309545), Spanish Ministry of Economy and Competitiveness (BFU2014-55054-P and BFU2017-86970-P) and “Fundació La Marató de TV3” (PI043296).



**Figure 1**

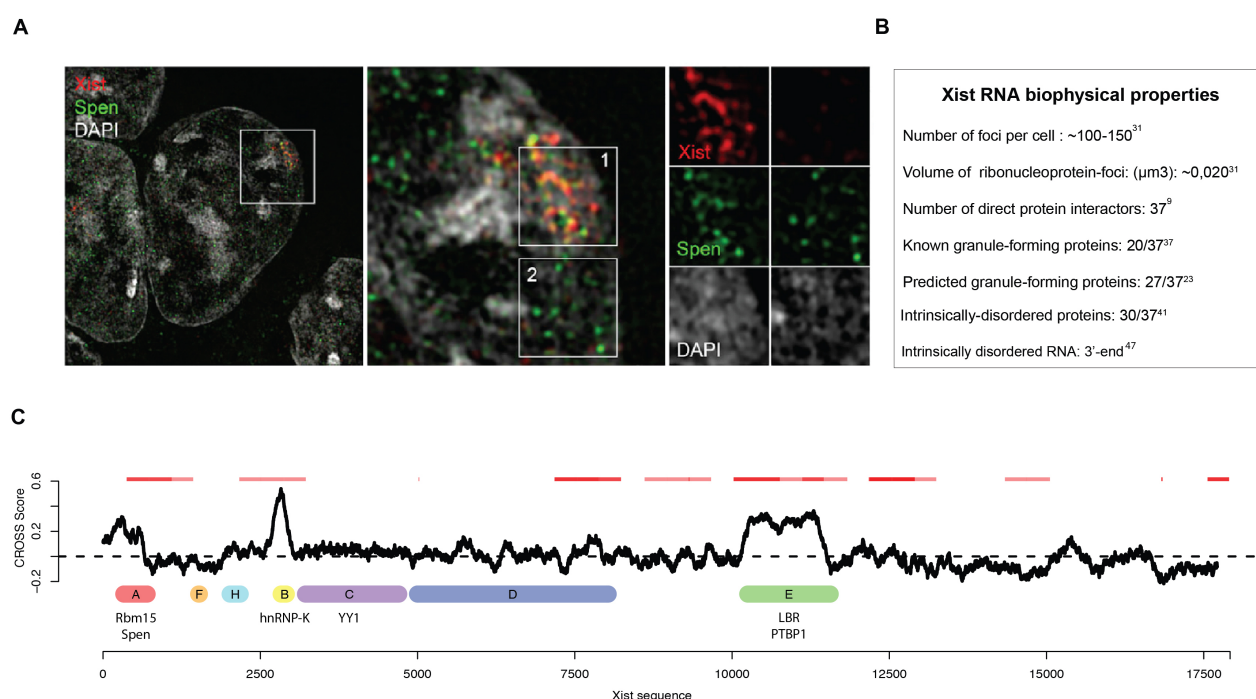

**Fig 1. A)** *Xist* forms silencing granules and is enriched for granule binding proteins. Left, representative image of *Xist* silencing granules<sup>7</sup>. With permission from the editor, *Cell Report*, volume 12, pages 562-72, Cell-Press, 2015 (Open Access, Creative Commons Attribution License (CC BY). **B)** Quantification of *Xist*-granule bio-physical properties and cellular distribution. *Xist* biophysical properties are shown<sup>31</sup>. **C)** *Xist* secondary structure prediction (y axis: CROSS score<sup>47</sup>; x axis: *Xist* sequence mouse mm10 (MGI:98974). Below CLIP-validated *Xist* binding partners<sup>10,11,13</sup>. Above binding sites regions of granule-forming interactions<sup>18-20,32</sup>

**Figure 2**

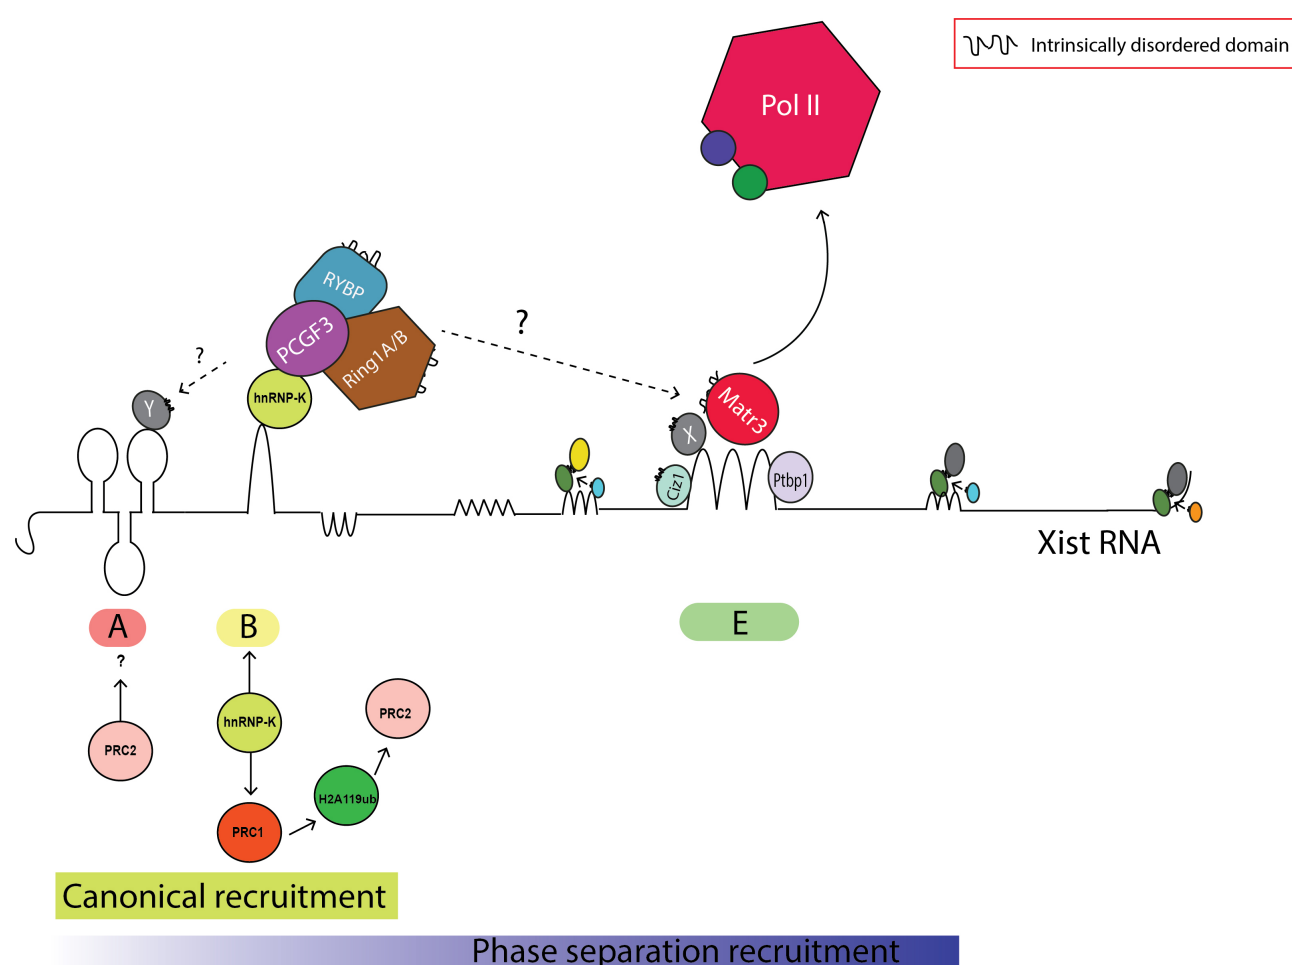

**Fig. 2. Phase separation and Xist RNA recruitment of repressive complexes.** In addition to the canonical PRC2 recruitment that involve repeat B (indirect, PRC1-mediated recruitment), we suggest that Xist recruits PRC1 once in a phase-separated state through mediation of structurally disordered proteins binding repeat E and repeat A. PRC1 complex recruitment could occur through a direct interaction with repeat E (e.g., Ring1b, Rybp) or via Ciz1 and Matr3 (as well as other unknown proteins X, binding to repeat E and containing intrinsically disordered regions). It is possible that PRC1 interacts with repeat A in a phase-separated state after the initial *de novo* seed has been placed via an unknown disordered protein Y. H2A ubiquitination by PRC1 may induce PRC2 recruitment on the Xi as previously shown (see main text). We suggest that the oligomerization can further recruit repressive proteins and/or disordered proteins, evicting Pol II

and basic transcription factors, recruiting more structurally disordered proteins and in turn, inducing further granule formation, heterochromatinization and gene-repression.

**Table 1**

| Name      | Ensembl ID          | GS   | UniProt | Dis | Conf | GP       |
|-----------|---------------------|------|---------|-----|------|----------|
| Safb      | ENSMUSG000000071054 | 0,61 | D3YXK2  | P   | 100% | 1,76539  |
| Hnrnpa2b1 | ENSMUSG000000004980 | 0,77 | O88569  | P   | 100% | 4,64115  |
| Rbm3      | ENSMUSG000000031167 | 1    | O89086  | P   | 95%  | 3,42532  |
| Ptbp1     | ENSMUSG000000006498 | 1,00 | P17225  | N   | 80%  | 0,701951 |
| Celf1     | ENSMUSG000000005506 | 0,75 | P28659  | N   | 75%  | 0,583633 |
| Hnrnpk    | ENSMUSG000000021546 | 1,00 | P61979  | P   | 95%  | 1,60143  |
| Srsf3     | ENSMUSG000000071172 | 0,97 | P84104  | P   | 95%  | 0,907059 |
| Rbm15     | ENSMUSG000000048109 | 0,89 | Q0VBL3  | P   | 100% | 1,73762  |
| Fubp3     | ENSMUSG000000026843 | 0,98 | Q3TIX6  | P   | 65%  | 1,31412  |
| Khsrp     | ENSMUSG000000007670 | 0,96 | Q3U0V1  | P   | 100% | 2,87269  |
| Lbr       | ENSMUSG000000004880 | 0,79 | Q3U9G9  | N   | 95%  | 0,313216 |
| Spen      | ENSMUSG000000040761 | 0,59 | Q3UV27  | P   | 100% | 1,33348  |
| Hnrnpd    | ENSMUSG000000000568 | 0,98 | Q60668  | P   | 100% | 2,91956  |
| Khdrbs1   | ENSMUSG000000028790 | 0,95 | Q60749  | P   | 100% | 1,14157  |
| Pcbp2     | ENSMUSG000000056851 | 0,99 | Q61990  | N   | 70%  | 0,526214 |
| Raly      | ENSMUSG000000027593 | 1,00 | Q64012  | P   | 100% | 1,5473   |
| Hnrnpq    | ENSMUSG000000032423 | 0,94 | Q7TMK9  | P   | 85%  | 2,27522  |
| Srsf7     | ENSMUSG000000024097 | 1,00 | Q8BL97  | P   | 80%  | 1,08023  |
| Rbfox2    | ENSMUSG000000033565 | 0,93 | Q8BP71  | P   | 100% | 1,31915  |
| Rbm14     | ENSMUSG000000006456 | 1,00 | Q8C2Q3  | P   | 95%  | 0,813179 |
| Myef2     | ENSMUSG000000027201 | 0,99 | Q8C854  | P   | 90%  | 2,67005  |
| Matr3     | ENSMUSG000000037236 | 0,99 | Q8K310  | P   | 100% | 1,52279  |
| Hnrnpl    | ENSMUSG000000015165 | 0,88 | Q8R081  | P   | 95%  | 1,86159  |
| Fbxw7     | ENSMUSG000000028086 | 0,99 | Q8VBV4  | P   | 60%  | 0,930762 |
| Hnrnpu    | ENSMUSG000000039630 | 0,66 | Q8VEK3  | P   | 95%  | 2,57089  |
| Hnrnpr    | ENSMUSG000000066037 | 0,69 | Q8VHM5  | P   | 90%  | 2,2197   |
| Tardbp    | ENSMUSG000000041459 | 0,88 | Q921F2  | P   | 75%  | 2,02467  |
| Hnrnpab   | ENSMUSG000000020358 | 1,00 | Q99020  | P   | 100% | 2,20498  |
| Nxf1      | ENSMUSG000000010097 | 0,89 | Q99JX7  | P   | 65%  | 0,83105  |
| Hnrnpa0   | ENSMUSG000000007836 | 0,98 | Q9CX86  | P   | 100% | 4,78458  |
| Srsf9     | ENSMUSG000000029538 | 0,94 | Q9D0B0  | N   | 55%  | 1,69123  |
| Hnrnpm    | ENSMUSG000000059208 | 0,75 | Q9D0E1  | P/N | 50%  | 2,51814  |
| Srsf10    | ENSMUSG000000028676 | 1,00 | Q9R0U0  | P   | 100% | 1,10287  |
| Preb      | ENSMUSG000000045302 | 0,89 | Q9WUQ2  | N   | 70%  | 0,553021 |
| Tcf7l1    | ENSMUSG000000055799 | 0,70 | Q9Z1J1  | P   | 100% | 0,384275 |
| Hnrnpc    | ENSMUSG000000060373 | 1,00 | Q9Z204  | P   | 100% | 1,3216   |
| Hnrnpf    | ENSMUSG000000042079 | 0,96 | Q9Z2X1  | N   | 85%  | 1,48422  |

**Table1.** *Xist* direct interactome enrichment for granule forming proteins. Tables also shown intrinsically disordered proteins (Dis), the degree of confidence (Conf) and the granule propensity (GP).

## Material and methods (in brief)

### Microscopy

Super resolution ImmunoRNA-FISH and Immuno-Fluorescence (IF) microscopy and analysis has been performed in previously-published research<sup>30,31</sup>.

### RNA Structure

We predicted the secondary structure of granule and non-granule transcripts using CROSS (Computational Recognition of Secondary Structure<sup>47</sup>. CROSS was developed to perform high-throughput RNA profiling. The algorithm predicts the structural profile (single- and double-stranded state) at single-nucleotide resolution using sequence information only and without sequence length restrictions (scores > 0 indicate double stranded regions).

### Protein-RNA interactions

*catRAPID Global Score* was used to compute the interaction propensity of *Xist* with proteins<sup>9</sup>. Exploiting sequence information, the algorithm integrates local properties of protein and RNA structures into an overall binding propensity (scores > 0.5 indicate strong interactions). All the proteins analysed in this article were previously reported in our previous publication<sup>9</sup> (including *Xist* putative interactome consisting of 631 proteins). We want to stress that the putative *Xist* interactome has a higher degree of false discovery rate (FDR)<sup>7,8,10,11,13</sup>, and therefore is less reliable than the putative direct interactome<sup>9</sup>.

## Granule propensity

Structural disorder, nucleic acid binding propensity and amino acid patterns such as arginine-glycine and phenylalanine-glycine are key features of proteins coalescing in granules<sup>23</sup>. These features were combined in a computational approach, *catGRANULE*, that we employed to identify RBPs assembling into granules (scores > 0 indicate granule propensity).

## References

- 1 Ransohoff, J. D., Wei, Y. & Khavari, P. A. The functions and unique features of long intergenic non-coding RNA. *Nature reviews. Molecular cell biology* **19**, 143-157, doi:10.1038/nrm.2017.104 (2018).
- 2 Engreitz, J. M., Ollikainen, N. & Guttman, M. Long non-coding RNAs: spatial amplifiers that control nuclear structure and gene expression. *Nature reviews. Molecular cell biology* **17**, 756-770, doi:10.1038/nrm.2016.126 (2016).
- 3 Iyer, M. K. *et al.* The landscape of long noncoding RNAs in the human transcriptome. *Nature genetics* **47**, 199-208, doi:10.1038/ng.3192 (2015).
- 4 Cerase, A., Pintacuda, G., Tattermusch, A. & Avner, P. Xist localization and function: new insights from multiple levels. *Genome biology* **16**, 166, doi:10.1186/s13059-015-0733-y (2015).
- 5 Pintacuda, G. & Cerase, A. X Inactivation Lessons from Differentiating Mouse Embryonic Stem Cells. *Stem cell reviews* **11**, 699-705, doi:10.1007/s12015-015-9597-5 (2015).
- 6 Long, Y., Wang, X., Youmans, D. T. & Cech, T. R. How do lncRNAs regulate transcription? *Science advances* **3**, eaao2110, doi:10.1126/sciadv.aao2110 (2017).
- 7 Moindrot, B. *et al.* A Pooled shRNA Screen Identifies Rbm15, Spen, and Wtap as Factors Required for Xist RNA-Mediated Silencing. *Cell reports* **12**, 562-572, doi:10.1016/j.celrep.2015.06.053 (2015).
- 8 Monfort, A. *et al.* Identification of Spen as a Crucial Factor for Xist Function through Forward Genetic Screening in Haploid Embryonic Stem Cells. *Cell reports* **12**, 554-561, doi:10.1016/j.celrep.2015.06.067 (2015).
- 9 Cirillo, D. *et al.* Quantitative predictions of protein interactions with long noncoding RNAs. *Nature methods* **14**, 5-6, doi:10.1038/nmeth.4100 (2016).
- 10 Minajigi, A. *et al.* Chromosomes. A comprehensive Xist interactome reveals cohesin repulsion and an RNA-directed chromosome conformation. *Science* **349**, doi:10.1126/science.aab2276 (2015).
- 11 McHugh, C. A. *et al.* The Xist lncRNA interacts directly with SHARP to silence transcription through HDAC3. *Nature* **521**, 232-236, doi:10.1038/nature14443 (2015).
- 12 Chen, C. K. *et al.* Xist recruits the X chromosome to the nuclear lamina to enable chromosome-wide silencing. *Science* **354**, 468-472, doi:10.1126/science.aae0047 (2016).
- 13 Chu, C. *et al.* Systematic discovery of Xist RNA binding proteins. *Cell* **161**, 404-416, doi:10.1016/j.cell.2015.03.025 (2015).

- 14 Pinter, S. F. A Tale of Two Cities: How Xist and its partners localize to and silence the bicompartamental X. *Seminars in cell & developmental biology* **56**, 19-34, doi:10.1016/j.semcdb.2016.03.023 (2016).
- 15 Cesana, M. *et al.* A long noncoding RNA controls muscle differentiation by functioning as a competing endogenous RNA. *Cell* **147**, 358-369, doi:10.1016/j.cell.2011.09.028 (2011).
- 16 Hirose, T. *et al.* NEAT1 long noncoding RNA regulates transcription via protein sequestration within subnuclear bodies. *Molecular biology of the cell* **25**, 169-183, doi:10.1091/mbc.E13-09-0558 (2014).
- 17 Wu, X. S. *et al.* LncRNA-PAGBC acts as a microRNA sponge and promotes gallbladder tumorigenesis. *EMBO reports* **18**, 1837-1853, doi:10.15252/embr.201744147 (2017).
- 18 Fox, A. H., Nakagawa, S., Hirose, T. & Bond, C. S. Paraspeckles: Where Long Noncoding RNA Meets Phase Separation. *Trends in biochemical sciences* **43**, 124-135, doi:10.1016/j.tibs.2017.12.001 (2018).
- 19 Khong, A. *et al.* The Stress Granule Transcriptome Reveals Principles of mRNA Accumulation in Stress Granules. *Molecular cell* **68**, 808-820 e805, doi:10.1016/j.molcel.2017.10.015 (2017).
- 20 Khong, A., Jain, S., Matheny, T., Wheeler, J. R. & Parker, R. Isolation of mammalian stress granule cores for RNA-Seq analysis. *Methods* **137**, 49-54, doi:10.1016/j.ymeth.2017.11.012 (2018).
- 21 Hyman, A. A., Weber, C. A. & Julicher, F. Liquid-liquid phase separation in biology. *Annual review of cell and developmental biology* **30**, 39-58, doi:10.1146/annurev-cellbio-100913-013325 (2014).
- 22 Bergeron-Sandoval, L. P., Safaee, N. & Michnick, S. W. Mechanisms and Consequences of Macromolecular Phase Separation. *Cell* **165**, 1067-1079, doi:10.1016/j.cell.2016.05.026 (2016).
- 23 Bolognesi, B. *et al.* A Concentration-Dependent Liquid Phase Separation Can Cause Toxicity upon Increased Protein Expression. *Cell reports* **16**, 222-231, doi:10.1016/j.celrep.2016.05.076 (2016).
- 24 Strom, A. R. *et al.* Phase separation drives heterochromatin domain formation. *Nature* **547**, 241-245, doi:10.1038/nature22989 (2017).
- 25 Larson, A. G. *et al.* Liquid droplet formation by HP1 $\alpha$  suggests a role for phase separation in heterochromatin. *Nature* **547**, 236-240, doi:10.1038/nature22822 (2017).
- 26 Wan, G. *et al.* Spatiotemporal regulation of liquid-like condensates in epigenetic inheritance. *Nature* **557**, 679-683, doi:10.1038/s41586-018-0132-0 (2018).
- 27 Wang, K. C. *et al.* A long noncoding RNA maintains active chromatin to coordinate homeotic gene expression. *Nature* **472**, 120-124, doi:10.1038/nature09819 (2011).
- 28 Belton, P., Carmody, M., Donohue, J. & O'Dwyer, W. F. IgA nephropathy (Berger's disease): a clinical study of 32 cases. *Irish journal of medical science* **149**, 310-314 (1980).
- 29 Marcho, C., Bevilacqua, A., Tremblay, K. D. & Mager, J. Tissue-specific regulation of Igf2r/Airn imprinting during gastrulation. *Epigenetics & chromatin* **8**, 10, doi:10.1186/s13072-015-0003-y (2015).
- 30 Cerase, A. *et al.* Spatial separation of Xist RNA and polycomb proteins revealed by superresolution microscopy. *Proceedings of the National Academy of Sciences of the United States of America* **111**, 2235-2240, doi:10.1073/pnas.1312951111 (2014).
- 31 Smeets, D. *et al.* Three-dimensional super-resolution microscopy of the inactive X chromosome territory reveals a collapse of its active nuclear compartment harboring distinct Xist RNA foci. *Epigenetics & chromatin* **7**, 8, doi:10.1186/1756-8935-7-8 (2014).



- 32 West, J. A. *et al.* Structural, super-resolution microscopy analysis of paraspeckle nuclear body organization. *The Journal of cell biology* **214**, 817-830, doi:10.1083/jcb.201601071 (2016).
- 33 Basu, R. *et al.* Using amino-labeled nucleotide probes for simultaneous single molecule RNA-DNA FISH. *PLoS one* **9**, e107425, doi:10.1371/journal.pone.0107425 (2014).
- 34 Golding, M. C. *et al.* Depletion of Kcnq1ot1 non-coding RNA does not affect imprinting maintenance in stem cells. *Development* **138**, 3667-3678, doi:10.1242/dev.057778 (2011).
- 35 Van Nostrand, E. L. *et al.* Robust transcriptome-wide discovery of RNA-binding protein binding sites with enhanced CLIP (eCLIP). *Nature methods* **13**, 508-514, doi:10.1038/nmeth.3810 (2016).
- 36 Lin, Y., Schmidt, B. F., Bruchez, M. P. & McManus, C. J. Structural analyses of NEAT1 lncRNAs suggest long-range RNA interactions that may contribute to paraspeckle architecture. *Nucleic acids research*, doi:10.1093/nar/gky046 (2018).
- 37 Markmiller, S. *et al.* Context-Dependent and Disease-Specific Diversity in Protein Interactions within Stress Granules. *Cell* **172**, 590-604 e513, doi:10.1016/j.cell.2017.12.032 (2018).
- 38 Hasegawa, Y. *et al.* The matrix protein hnRNP U is required for chromosomal localization of Xist RNA. *Developmental cell* **19**, 469-476, doi:10.1016/j.devcel.2010.08.006 (2010).
- 39 Pintacuda, G. *et al.* hnRNPK Recruits PCGF3/5-PRC1 to the Xist RNA B-Repeat to Establish Polycomb-Mediated Chromosomal Silencing. *Molecular cell* **68**, 955-969 e910, doi:10.1016/j.molcel.2017.11.013 (2017).
- 40 Aiello, A. *et al.* MALAT1 and HOTAIR Long Non-Coding RNAs Play Opposite Role in Estrogen-Mediated Transcriptional Regulation in Prostate Cancer Cells. *Scientific reports* **6**, 38414, doi:10.1038/srep38414 (2016).
- 41 Klus, P. *et al.* The cleverSuite approach for protein characterization: predictions of structural properties, solubility, chaperone requirements and RNA-binding abilities. *Bioinformatics* **30**, 1601-1608, doi:10.1093/bioinformatics/btu074 (2014).
- 42 Vavouri, T., Semple, J. I., Garcia-Verdugo, R. & Lehner, B. Intrinsic protein disorder and interaction promiscuity are widely associated with dosage sensitivity. *Cell* **138**, 198-208, doi:10.1016/j.cell.2009.04.029 (2009).
- 43 Zanzoni, A. *et al.* Principles of self-organization in biological pathways: a hypothesis on the autogenous association of alpha-synuclein. *Nucleic acids research* **41**, 9987-9998, doi:10.1093/nar/gkt794 (2013).
- 44 Babu, M. M. The contribution of intrinsically disordered regions to protein function, cellular complexity, and human disease. *Biochemical Society transactions* **44**, 1185-1200, doi:10.1042/BST20160172 (2016).
- 45 Pintacuda, G., Young, A. N. & Cerase, A. Function by Structure: Spotlights on Xist Long Non-coding RNA. *Frontiers in molecular biosciences* **4**, 90, doi:10.3389/fmolb.2017.00090 (2017).
- 46 Fang, R., Moss, W. N., Rutenberg-Schoenberg, M. & Simon, M. D. Probing Xist RNA Structure in Cells Using Targeted Structure-Seq. *PLoS genetics* **11**, e1005668, doi:10.1371/journal.pgen.1005668 (2015).
- 47 Delli Ponti, R., Marti, S., Armaos, A. & Tartaglia, G. G. A high-throughput approach to profile RNA structure. *Nucleic acids research* **45**, e35, doi:10.1093/nar/gkw1094 (2017).
- 48 Maharana, S. *et al.* RNA buffers the phase separation behavior of prion-like RNA binding proteins. *Science*, doi:10.1126/science.aar7366 (2018).

- 49 Agostini, F., Cirillo, D., Bolognesi, B. & Tartaglia, G. G. X-inactivation: quantitative predictions of protein interactions in the Xist network. *Nucleic acids research* **41**, e31, doi:10.1093/nar/gks968 (2013).
- 50 Sunwoo, H., Wu, J. Y. & Lee, J. T. The Xist RNA-PRC2 complex at 20-nm resolution reveals a low Xist stoichiometry and suggests a hit-and-run mechanism in mouse cells. *Proceedings of the National Academy of Sciences of the United States of America* **112**, E4216-4225, doi:10.1073/pnas.1503690112 (2015).
- 51 Han, T. W. *et al.* Cell-free formation of RNA granules: bound RNAs identify features and components of cellular assemblies. *Cell* **149**, 768-779, doi:10.1016/j.cell.2012.04.016 (2012).
- 52 Marchese, D., de Groot, N. S., Lorenzo Gotor, N., Livi, C. M. & Tartaglia, G. G. Advances in the characterization of RNA-binding proteins. *Wiley interdisciplinary reviews. RNA* **7**, 793-810, doi:10.1002/wrna.1378 (2016).
- 53 Tartaglia, G. G. The Grand Challenge of Characterizing Ribonucleoprotein Networks. *Frontiers in molecular biosciences* **3**, 24, doi:10.3389/fmolb.2016.00024 (2016).
- 54 Zhao, J., Sun, B. K., Erwin, J. A., Song, J. J. & Lee, J. T. Polycomb proteins targeted by a short repeat RNA to the mouse X chromosome. *Science* **322**, 750-756, doi:10.1126/science.1163045 (2008).
- 55 Kanhere, A. *et al.* Short RNAs are transcribed from repressed polycomb target genes and interact with polycomb repressive complex-2. *Molecular cell* **38**, 675-688, doi:10.1016/j.molcel.2010.03.019 (2010).
- 56 Almeida, M. *et al.* PCGF3/5-PRC1 initiates Polycomb recruitment in X chromosome inactivation. *Science* **356**, 1081-1084, doi:10.1126/science.aal2512 (2017).
- 57 Maenner, S. *et al.* 2-D structure of the A region of Xist RNA and its implication for PRC2 association. *PLoS biology* **8**, e1000276, doi:10.1371/journal.pbio.1000276 (2010).
- 58 da Rocha, S. T. *et al.* Jarid2 Is Implicated in the Initial Xist-Induced Targeting of PRC2 to the Inactive X Chromosome. *Molecular cell* **53**, 301-316, doi:10.1016/j.molcel.2014.01.002 (2014).
- 59 Blackledge, N. P. *et al.* Variant PRC1 complex-dependent H2A ubiquitylation drives PRC2 recruitment and polycomb domain formation. *Cell* **157**, 1445-1459, doi:10.1016/j.cell.2014.05.004 (2014).
- 60 Comet, I. & Helin, K. Revolution in the Polycomb hierarchy. *Nature structural & molecular biology* **21**, 573-575, doi:10.1038/nsmb.2848 (2014).
- 61 Botta-Ofilia T. *et al.* Phase separation driven by RNA scaffolds and protein sequestration in FXTAS. *BioRxiv*, April 13<sup>th</sup>, 2018. <https://doi.org/10.1101/298943>
